# Supplementary material for: Functionalization of MOF-5 with mono-substituents: effects on drug delivery behavior
Source: Royal Society of Chemistry journal article supplement (doi:10.1039/d0ra06106a), 2020-01-01
Supplement: d0ra06106a1.pdf [file d0ra06106a1.pdf]

Electronic Supplementary Material (ESI) for RSC Advances.  
This journal is © The Royal Society of Chemistry 2020

## Electronic Supplementary Information

### Functionalization of MOF-5 with mono-substituent: the effect on the drug delivery behavior

Mengru Cai,<sup>a</sup> Liuying Qin,<sup>a</sup> Longtai You,<sup>a</sup> Yu Yao,<sup>a</sup> Huimin Wu,<sup>a</sup> Zhiqin Zhang,<sup>a</sup> Lu Zhang,<sup>\*c</sup> Xingbin Yin<sup>\*a</sup> and Jian Ni<sup>\*ab</sup>

<sup>a</sup> School of Chinese Material Medica, Beijing University of Chinese Medicine, Beijing 102488, China.

<sup>b</sup> Beijing Research Institute of Chinese Medicine, Beijing University of Chinese Medicine, Beijing 100029, China.

<sup>c</sup> Department of Biochemistry and Molecular Medicine, UC Davis NCI-designated Comprehensive Cancer Center, University of California Davis, Sacramento, CA, USA.

\* Correspondence author. E-mail: lluzhang@ucdavis.edu (L.Z.); yxbtcm@163.com (X.Y.); 602054@bucm.edu.cn (J.N.)

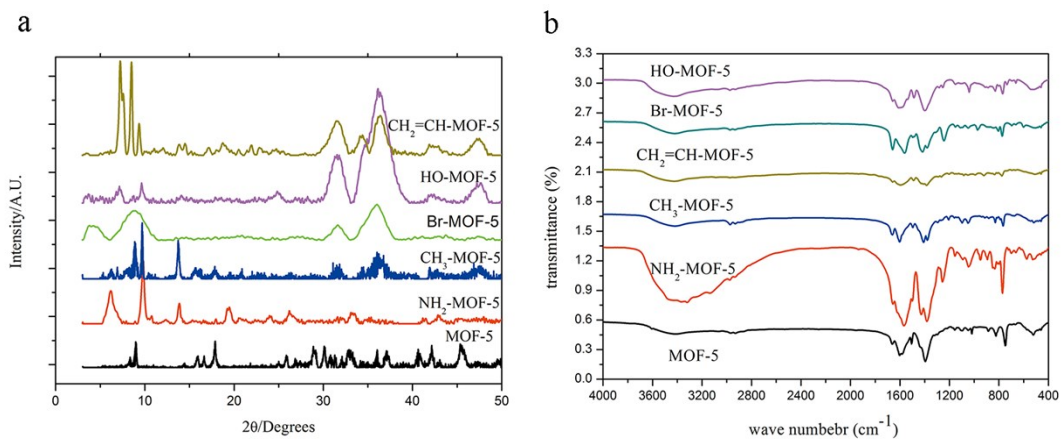

**Fig. S1** PXRD patterns (a) and FTIR (b) spectra of MOF-5, NH<sub>2</sub>-MOF-5, CH<sub>3</sub>-MOF-5, Br-MOF-5, HO-MOF-5 and CH<sub>2</sub>=CH-MOF-5.

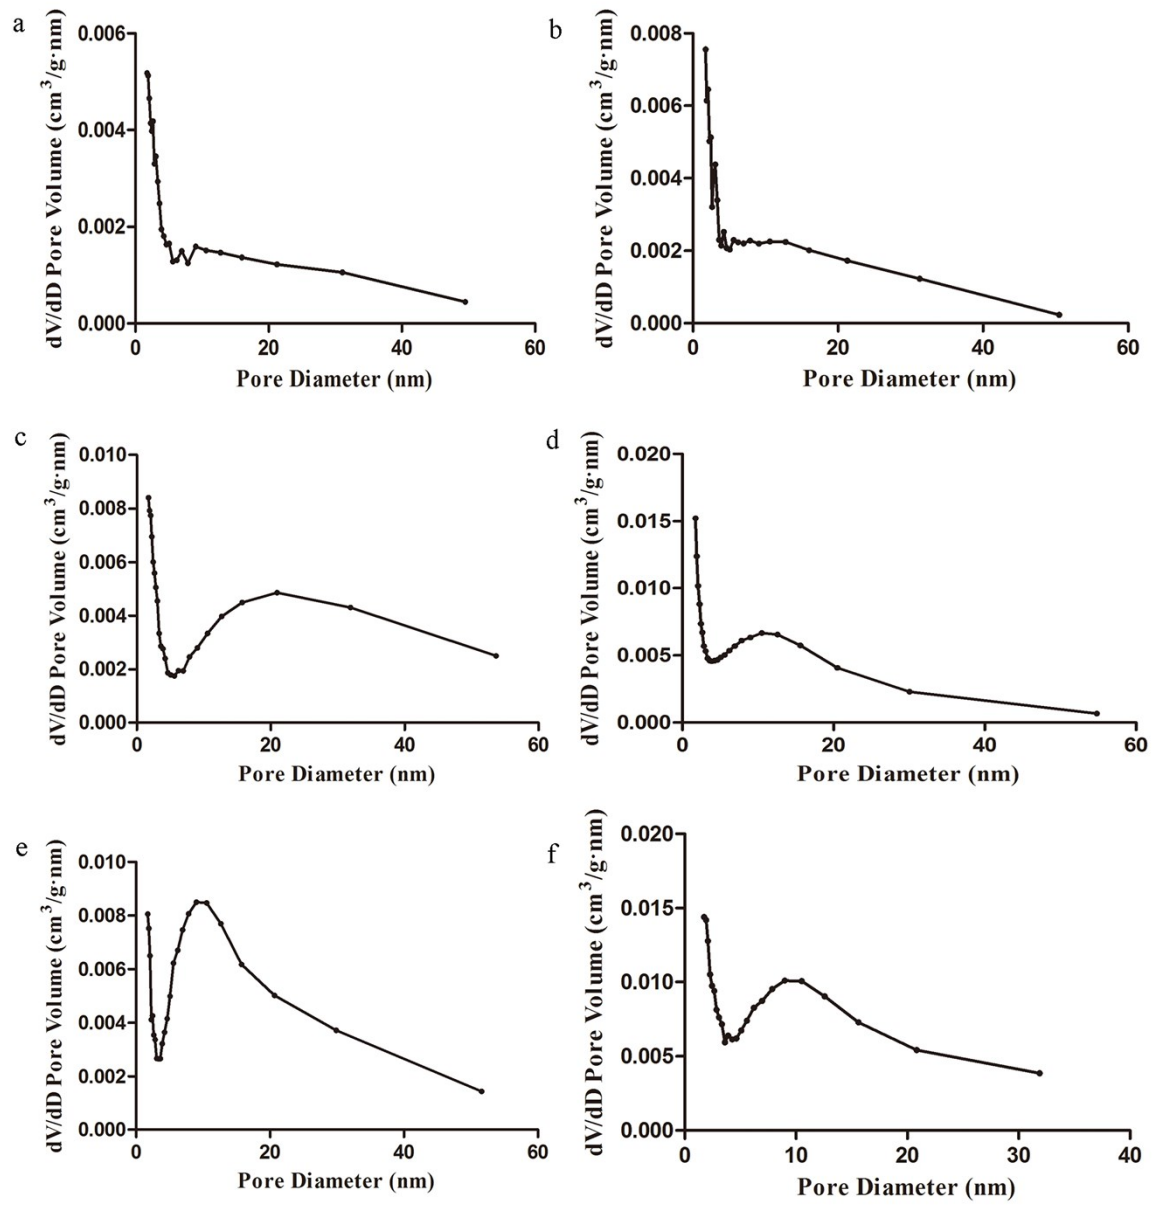

**Fig. S2** Pore size distribution of MOFs calculated by the Horvath - Kawazoe model, MOF-5 (a),  $\text{NH}_2$ -MOF-5 (b),  $\text{CH}_3$ -MOF-5 (c), Br-MOF-5 (d), HO-MOF-5 (e) and  $\text{CH}_2=\text{CH}$ -MOF-5 (f).

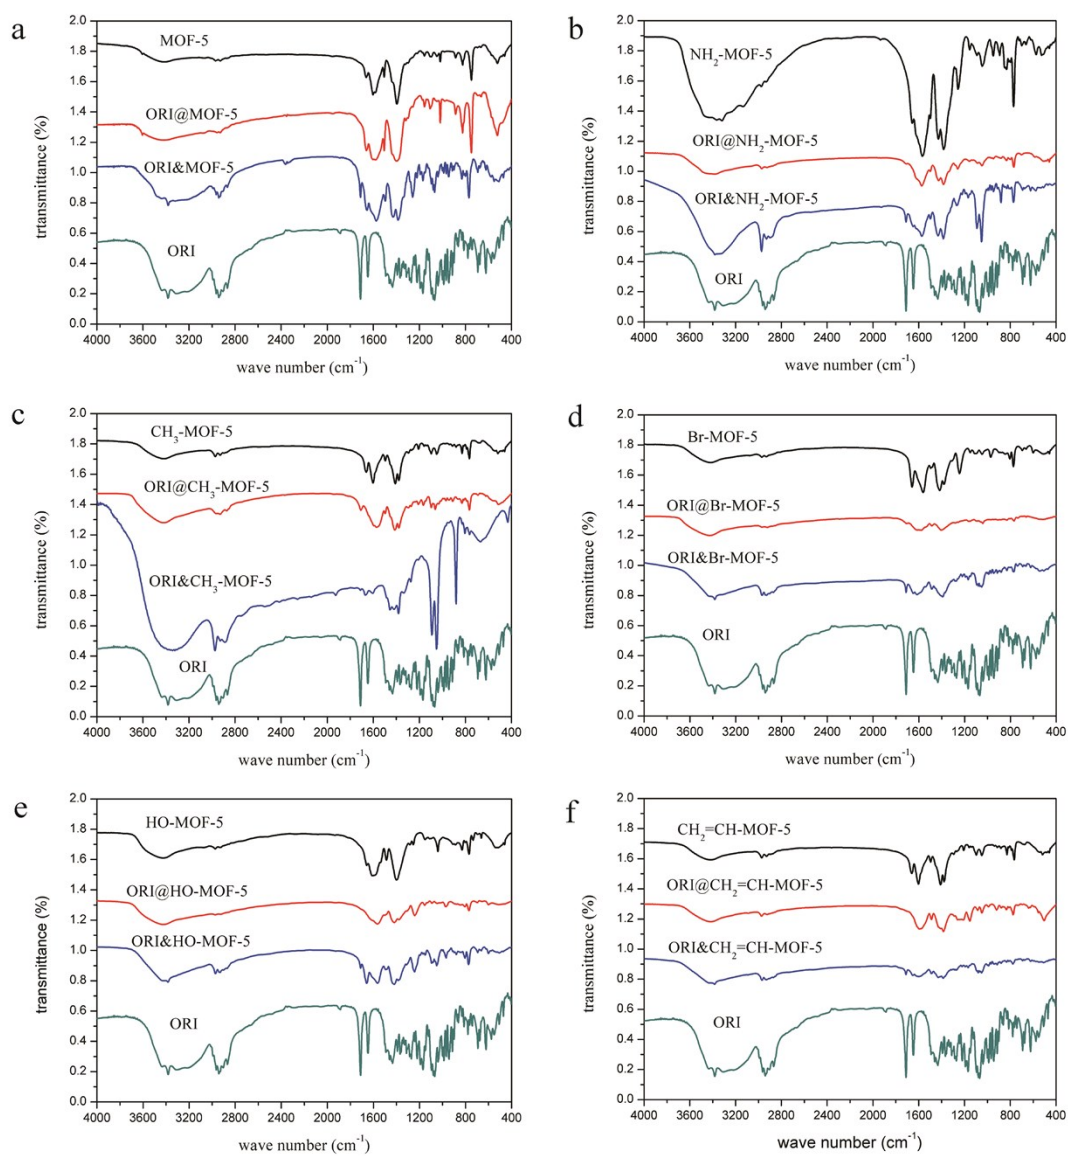

**Fig. S3** FTIR spectra of ORI@MOF-5 (a), ORI@ $\text{NH}_2$ -MOF-5 (b), ORI@ $\text{CH}_3$ -MOF-5 (c), ORI@Br-MOF-5 (d), ORI@HO-MOF-5 (e) and ORI@ $\text{CH}_2=\text{CH}$ -MOF-5 (f).

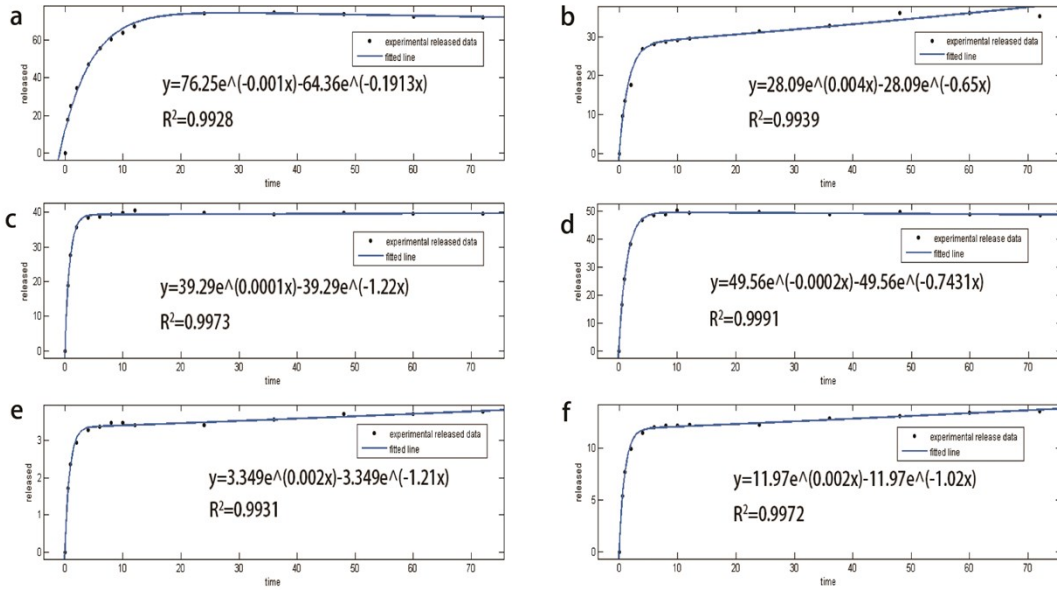

**Fig. S4** The new distribution model simulation of ORI release curve.

**Table S1** The fitting results of ORI@MOFs in the zero order, first order, Higuchi and Riter-Peppas model.

| MOFs                      | pH  | Model                  | Equation                                    | R <sup>2</sup> |
|---------------------------|-----|------------------------|---------------------------------------------|----------------|
| MOF-5                     | 5.5 | zero order equation    | $Mt = 0.6331t + 44.242$                     | 0.3931         |
|                           |     | first order equation   | $\ln(1-Mt/M_{\infty}) = -0.0146t - 0.6777$  | 0.4884         |
|                           |     | Higuchi equation       | $Mt/M_{\infty} = 8.9591t^{1/2} - 1.4634$    | 0.6392         |
|                           |     | Ritger-Peppas equation | $\ln(Mt/M_{\infty}) = 0.2281\ln t - 1.0566$ | 0.8431         |
|                           | 7.4 | zero order equation    | $Mt = 0.6812t + 38.965$                     | 0.4562         |
|                           |     | first order equation   | $\ln(1-Mt/M_{\infty}) = -0.0147t - 0.5624$  | 0.5576         |
|                           |     | Higuchi equation       | $Mt/M_{\infty} = 9.4012t^{1/2} - 1.311$     | 0.7021         |
|                           |     | Ritger-Peppas equation | $\ln(Mt/M_{\infty}) = 0.2749\ln t - 1.262$  | 0.8648         |
| NH <sub>2</sub> -MOF-5    | 5.5 | zero order equation    | $Mt = 0.315t + 18.966$                      | 0.4820         |
|                           |     | first order equation   | $\ln(1-Mt/M_{\infty}) = -0.0042t - 0.217$   | 0.5322         |
|                           |     | Higuchi equation       | $Mt/M_{\infty} = 21.008t^{1/2} - 1.6755$    | 0.7096         |
|                           |     | Ritger-Peppas equation | $\ln(Mt/M_{\infty}) = 0.2396\ln t + 2.7074$ | 0.8596         |
|                           | 7.4 | zero order equation    | $Mt = 0.2718t + 19.5$                       | 0.3955         |
|                           |     | first order equation   | $\ln(1-Mt/M_{\infty}) = -0.0035t - 0.2245$  | 0.4301         |
|                           |     | Higuchi equation       | $Mt/M_{\infty} = 20.79t^{1/2} - 1.5495$     | 0.6307         |
|                           |     | Ritger-Peppas equation | $\ln(Mt/M_{\infty}) = 0.2203\ln t + 2.7442$ | 0.8160         |
| CH <sub>3</sub> -MOF-5    | 5.5 | zero order equation    | $Mt = 0.2036t + 30.002$                     | 0.1810         |
|                           |     | first order equation   | $\ln(1-Mt/M_{\infty}) = -0.0028t - 0.3726$  | 0.1976         |
|                           |     | Higuchi equation       | $Mt/M_{\infty} = 14.375t^{1/2} - 1.2566$    | 0.3694         |
|                           |     | Ritger-Peppas equation | $\ln(Mt/M_{\infty}) = 0.106\ln t + 3.3485$  | 0.5892         |
|                           | 7.4 | zero order equation    | $Mt = 0.2555t + 29.047$                     | 0.2345         |
|                           |     | first order equation   | $\ln(1-Mt/M_{\infty}) = -0.0036t - 0.3613$  | 0.2556         |
|                           |     | Higuchi equation       | $Mt/M_{\infty} = 0.0235t^{1/2} + 0.166$     | 0.5950         |
|                           |     | Ritger-Peppas equation | $\ln(Mt/M_{\infty}) = 0.1567\ln t + 3.2213$ | 0.6537         |
| Br-MOF-5                  | 5.5 | zero order equation    | $Mt = 0.3009t + 34.578$                     | 0.2182         |
|                           |     | first order equation   | $\ln(1-Mt/M_{\infty}) = -0.0045t - 0.4568$  | 0.2344         |
|                           |     | Higuchi equation       | $Mt/M_{\infty} = 11.498t^{1/2} - 1.0276$    | 0.4286         |
|                           |     | Ritger-Peppas equation | $\ln(Mt/M_{\infty}) = 0.1682\ln t + 3.3619$ | 0.6267         |
|                           | 7.4 | zero order equation    | $Mt = 0.3274t + 37.948$                     | 0.2112         |
|                           |     | first order equation   | $\ln(1-Mt/M_{\infty}) = -0.0051t - 0.522$   | 0.2234         |
|                           |     | Higuchi equation       | $Mt/M_{\infty} = 10.332t^{1/2} - 0.9569$    | 0.4231         |
|                           |     | Ritger-Peppas equation | $\ln(Mt/M_{\infty}) = 0.1712\ln t + 3.4454$ | 0.6278         |
| HO-MOF-5                  | 5.5 | zero order equation    | $Mt = 0.023t + 2.5558$                      | 0.2853         |
|                           |     | first order equation   | $\ln(1-Mt/M_{\infty}) = -0.0002t - 0.026$   | 0.2884         |
|                           |     | Higuchi equation       | $Mt/M_{\infty} = 183.59t^{1/2} - 1.8995$    | 0.4895         |
|                           |     | Ritger-Peppas equation | $\ln(Mt/M_{\infty}) = 0.1229\ln t + 0.8853$ | 0.7505         |
|                           | 7.4 | zero order equation    | $Mt = 0.0166t + 2.5879$                     | 0.1636         |
|                           |     | first order equation   | $\ln(1-Mt/M_{\infty}) = -0.0002t - 0.0263$  | 0.1644         |
|                           |     | Higuchi equation       | $Mt/M_{\infty} = 163.14t^{1/2} - 1.1223$    | 0.3511         |
|                           |     | Ritger-Peppas equation | $\ln(Mt/M_{\infty}) = 0.1046\ln t + 0.8946$ | 0.5710         |
| CH <sub>2</sub> =CH-MOF-5 | 5.5 | zero order equation    | $Mt = 0.0894t + 8.7941$                     | 0.3194         |
|                           |     | first order equation   | $\ln(1-Mt/M_{\infty}) = -0.001t - 0.093$    | 0.3320         |
|                           |     | Higuchi equation       | $Mt/M_{\infty} = 52.214t^{1/2} - 1.8884$    | 0.5330         |
|                           | 7.4 | Ritger-Peppas equation | $\ln(Mt/M_{\infty}) = 0.1458\ln t + 2.0822$ | 0.7665         |
|                           |     | zero order equation    | $Mt = 0.0655t + 8.013$                      | 0.2213         |
|                           |     | first order equation   | $\ln(1-Mt/M_{\infty}) = -0.0007t - 0.0843$  | 0.2258         |

---

|                        |                                            |        |
|------------------------|--------------------------------------------|--------|
| Higuchi equation       | $Mt/M_{\infty} = 53.189t^{1/2} - 1.3187$   | 0.4285 |
| Ritger-Peppas equation | $\ln(Mt/M_{\infty}) = 0.139\ln t + 1.9691$ | 0.6476 |

---
